# Supplementary material for: Folate-targeted perfluorohexane nanoparticles carrying bismuth sulfide for use in US/CT dual-mode imaging and synergistic high-intensity focused ultrasound ablation of cervical cancer
Source: Royal Society of Chemistry journal article supplement (doi:10.1039/c6tb00261g), 2016-01-01
Supplement: c6tb00261g1.pdf [file c6tb00261g1.pdf]

## Supporting information

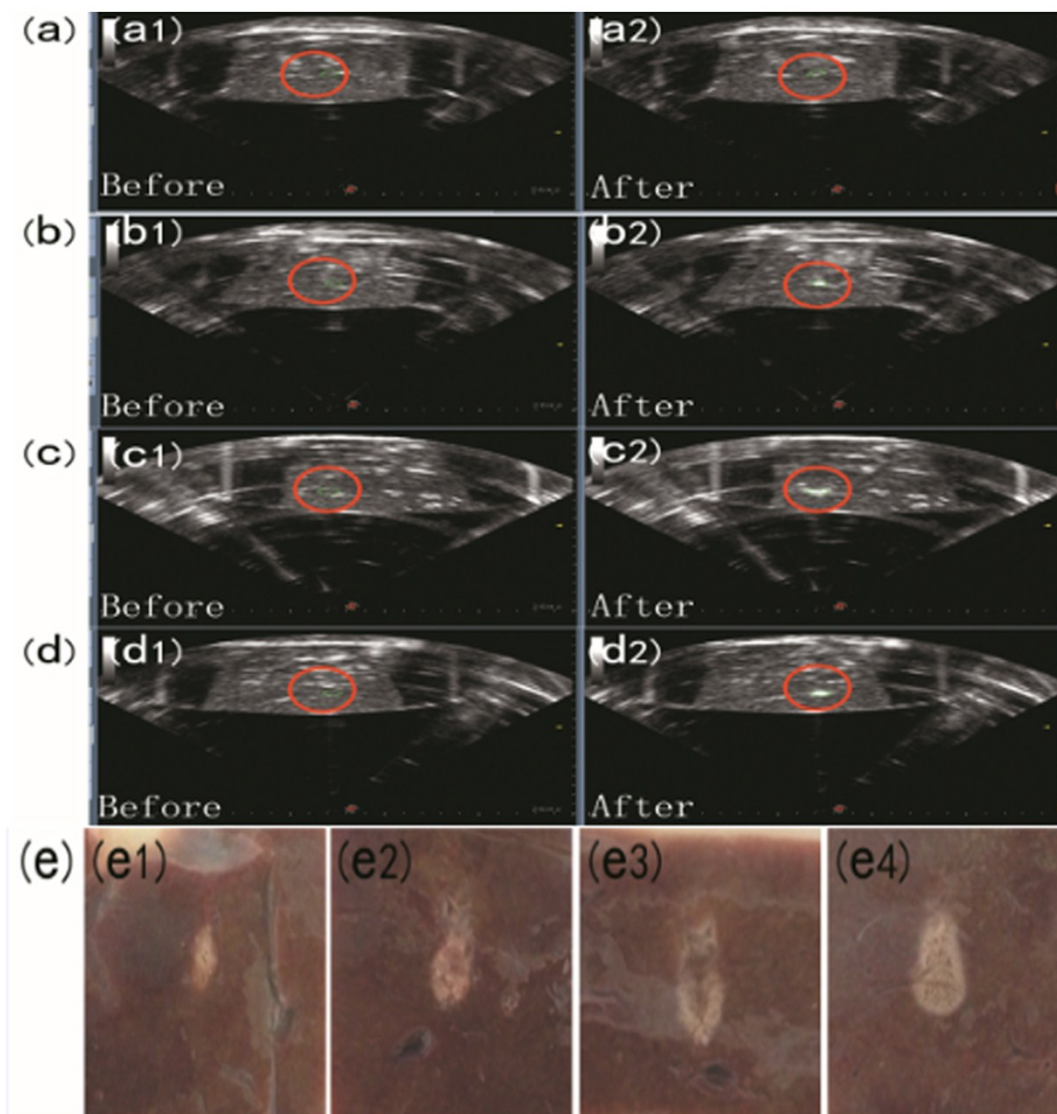

**Figure S1.** (a-d) Typical *in vitro* B-mode ultrasound images before (a<sub>1</sub>-d<sub>1</sub>) and after (a<sub>2</sub>-d<sub>2</sub>) HIFU exposure on degassed bovine livers at 150 W for 2 s after injecting different agents (a: saline; b: L-PFH-NPs; c: NLBS-PFH-NPs; d: FLBS-PFH-NPs). (e) Coagulative necrosis region of bovine liver tissue exposed to HIFU ablation at 150 W for 2 s by macroscopic inspections after injecting of different agents (e<sub>1</sub>: saline solution e<sub>2</sub>: L-PFH-NPs e<sub>3</sub>: NLBS-PFH-NPs e<sub>4</sub>: FLBS-PFH-NPs). The necrotic tissue is represented in gray,

non-ablated tissue in red.

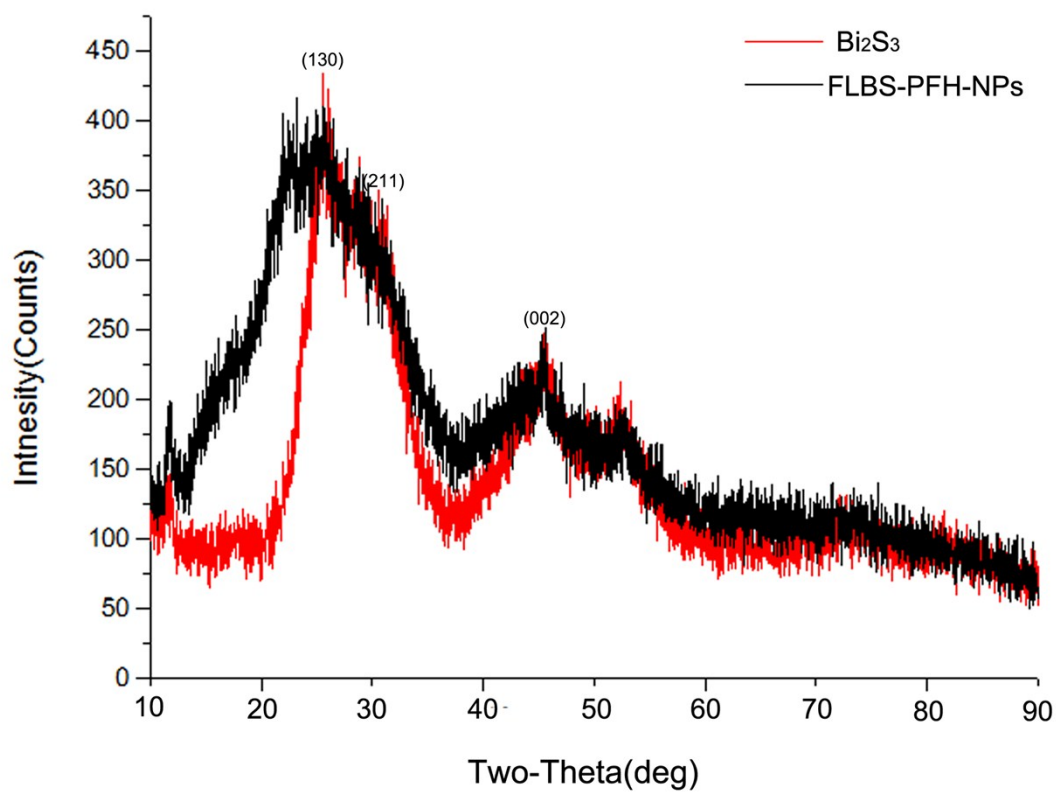

**Figure S2.** XRD pattern of  $\text{Bi}_2\text{S}_3$  and FLBS-PFH-NPs nanoparticles. The reflection peaks of FLBS-PFH-NPs were well consistent to the  $\text{Bi}_2\text{S}_3$  nanoparticles indicating that the  $\text{Bi}_2\text{S}_3$  were embedded within the lipid droplets.

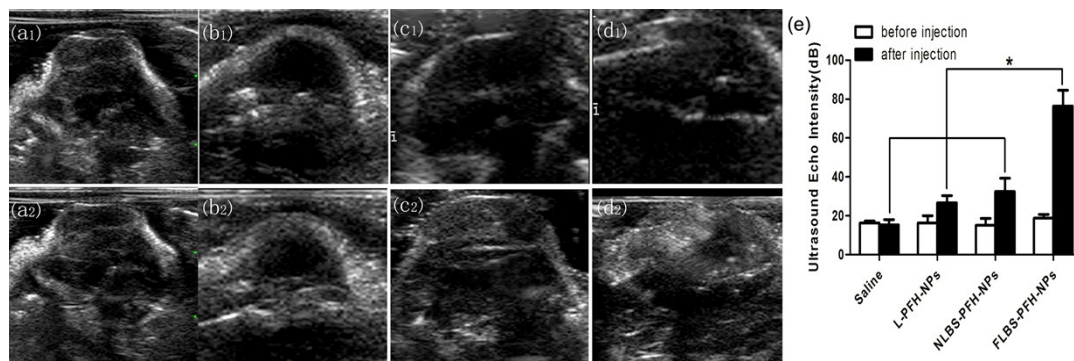

**Figure S3.** *In vivo* ultrasound imaging of tumor-bearing mice before (a<sub>1</sub>-d<sub>1</sub>) and after (a<sub>2</sub>-d<sub>2</sub>) administration different agents (a: saline; b: L-PFH-NPs; c: NLBS-PFH-NPs; d: FLBS-PFH-NPs). The ultrasound echo intensity in tumor tissue of folate-targeted group (FLBS-PFH-NPs) was higher than that in the other three groups (\*p<0.05).

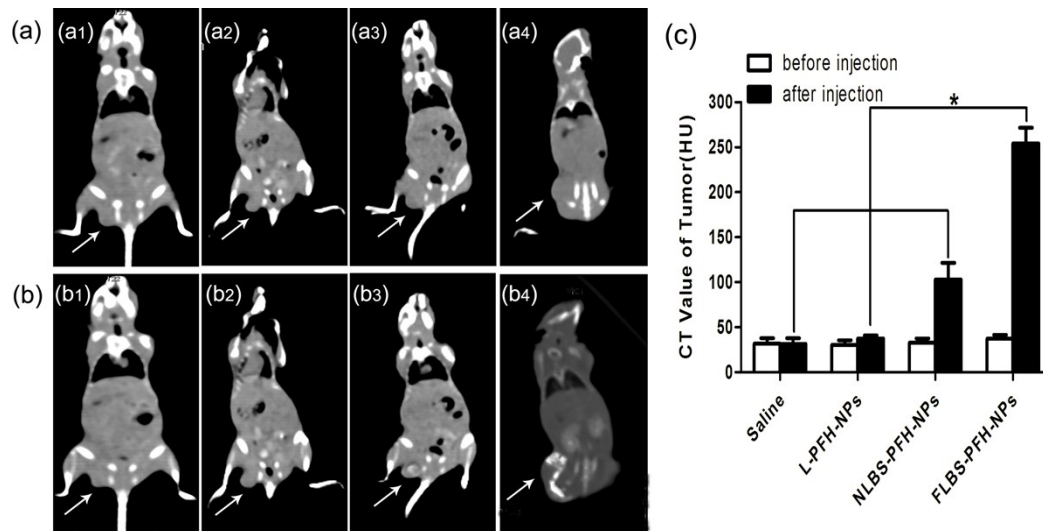

**Figure S4.** *In vivo* CT imaging of tumor-bearing mice before (a<sub>1</sub>-a<sub>4</sub>) and after (b<sub>1</sub>-b<sub>4</sub>) administration different agents (a<sub>1</sub>-b<sub>1</sub>: saline; a<sub>2</sub>-b<sub>2</sub>: L-PFH-NPs; a<sub>3</sub>-b<sub>3</sub>: NLBS-PFH-NPs; a<sub>4</sub>-b<sub>4</sub>: FLBS-PFH-NPs). The CT contrast intensity in tumor tissue of folate-targeted group (FLBS-PFH-NPs) was higher than that in the other three groups (\*p<0.05).

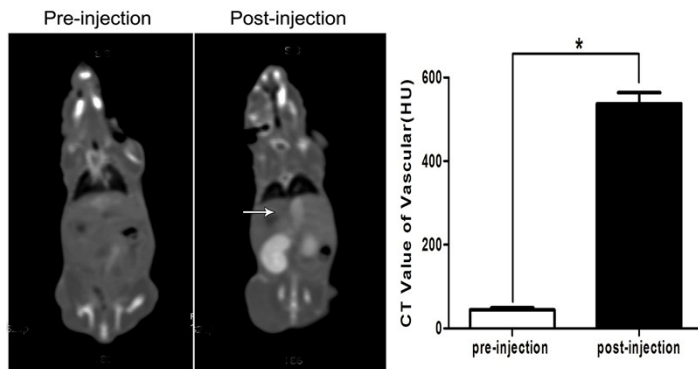

**Figure S5.** *In vivo* CT images of mice showing vascular CT contrast before and after injecting FLBS-PFH-NPs agent(\* $p < 0.05$ ).

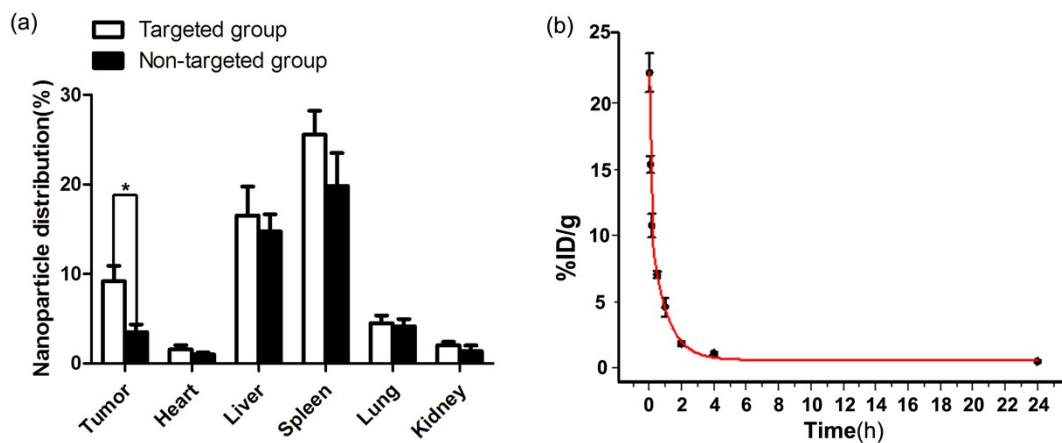

**Figure S6.**(a)*In vivo* tissue distributions of FLBS-PFH-NPs in tumor-bearing nude mice at 3h after intravenous injection of FLBS-PFH-NPs (targeted group) or NLBS-PFH-NPs (non-targeted group). The percentages were calculated by the formula (Bi weight in each tissue/the total Si weigh of injected particles). It was found that Bi concentration of tumor in FLBS-PFH-NPs group was higher than that in NLBS-PFH-NPs group (\* $P < 0.05$ ). (b) *In vivo* blood terminal half-life ( $t_{1/2}$ ) of FLBS-PFH-NPs.
